# Supplementary material for: Deeply reduced empty Keggin clusters [MoIVxMVI12−xO40−xpyx] (x = 3, 6; M = Mo, W; py = pyridine): synthesis, structures, and Lewis field catalysis
Source: Royal Society of Chemistry journal article supplement (doi:10.1039/d1qi01080h), 2021-01-01
Supplement: d1qi01080h1.pdf [file d1qi01080h1.pdf]

## Supplementary Information

### Deeply Reduced Empty Keggin Clusters $[\text{Mo}^{\text{IV}}_x\text{M}^{\text{VI}}_{12-x}\text{O}_{40-x}\text{py}_x]$ ( $x = 3, 6$ ; $\text{M} = \text{Mo}, \text{W}$ ; $\text{py} = \text{pyridine}$ ): Synthesis, Structures and Lewis Field Catalysis

Cuiming Ren,<sup>ab</sup> Zhihao Lu,<sup>bc</sup> Benlong Luo,<sup>b</sup> Xiaofeng Yi,<sup>b</sup> Lifang Lin<sup>bc</sup> and Li Xu<sup>b\*</sup>

<sup>a</sup> School of Chemistry and Materials Science, Fujian Normal University, Fuzhou, Fujian 350007, China

<sup>b</sup> State Key Laboratory of Structure Chemistry, Fujian Institute of Research on the Structure of Matter, Chinese Academy of Science, Fuzhou, Fujian 350002, China

<sup>c</sup> University of Chinese Academy of Sciences, Beijing 100049, China

\* xli@fjirsm.ac.cn

## 1. Experimental Section

### 1.1 Methods and Materials

All chemicals were obtained from commercial sources and used without further purification. The elemental analysis (C, H and N) were performed using a vario MICRO elemental analyzer. ICP-OES (inductively coupled plasma-optical emission spectroscopy) analysis (W, Mo) were carried on Ultima 2. IR spectra were recorded with a Magna 750 FTIR spectrometer photometer as KBr pellets in the 4000~400  $\text{cm}^{-1}$  region. UV-vis spectra were measured on a Horiba Labram HR800 Evolution spectrometer. Powder X-ray diffraction was recorded on a Rigaku Ultima-IV diffractometer. The X-ray photoelectron spectroscopy (XPS) measurements were carried out on a ESCALAB 250Xi spectrometer equipped with an Al  $K\alpha$  X-ray source. The intensity data were collected on a Bruker D8-venture (2, 3), Mercury 70 CCD (1) or Saturn 724+ (4) diffractometer with graphite-monochromated  $\text{MoK}\alpha$  radiation ( $\lambda = 0.71073 \text{ \AA}$ ). All absorption corrections were performed using multiscan. The structures were solved by direct methods and refined by full-matrix least-squares on  $F^2$  with the SHELXTL-2016 program package.

### 1.2 DFT calculations

DFT calculations were performed using the GAUSSIAN 16 program package<sup>42</sup> and crystal structure parameters. DFT calculations were carried out using the (U)B3LYP functional, that is, Beck's hybrid three-parameter exchange functional<sup>43</sup> with the Lee-Yang-Parr correlation function.<sup>44</sup> In these calculations, the solvent effects were taken into account by the Polarizable Continuum Model (PCM).<sup>45,46</sup> The natural atomic orbital (NAO) analysis were calculated by the NBO 3.1 module embedded in Gaussian 16 program. The analysis of frontier molecular orbitals and spin densities were performed by Multiwfn,<sup>47</sup> which is a multifunctional wavefunction analysis program.

### 1.3 Catalytic hydrogenation tests

The hydrogenation reduction of nitroarenes to anilines with hydrazine hydrate in the presence of  $\{\text{Mo}^{\text{IV}}_6\text{W}_6\}$ -**2**,  $\{\text{Mo}^{\text{IV}}_6\text{W}_6\text{Na}\}$ -**3** and  $\{\text{Mo}^{\text{IV}}_6\text{Mo}^{\text{VI}}\text{W}_5\}$ -**4** were investigated. General procedure for the reduction of nitroarenes: **2** (8.4 mg, 3 mol %, 0.0029 mmol), **3** (8.5 mg, 3 mol %, 0.0029 mmol) and **4** (17.1 mg, 3 mol %, 0.0029 mmol) were respectively added into a 25 mL round bottomed flask containing a mixture of nitroarenes (10  $\mu\text{L}$ , 0.097 mmol), ethanol (2 mL) with magnetic stirring. Then,  $\text{N}_2\text{H}_4\cdot\text{H}_2\text{O}$  (85%) (20  $\mu\text{L}$ , 0.3 mmol) were added into the reactors and heated to reflux with stirring at 80 °C for 2 hours. The reactions were complete (incomplete or messy) detected by TLC (*n*-hexane/ethyl acetate = 5:1). The samples were obtained by centrifugation and filtration and analyzed by Shimadzu GC-2014C. The reduction of nitroarenes to anilines in this catalytic system based on  $[\text{Mo}^{\text{IV}}_6\text{Mo}^{\text{VI}}_7\text{O}_{32}(\text{OH})_4\text{py}_6]^{2-}$  has been conducted for performance comparisons and mechanism study.

## 2. Tables

**Table S1** BVS results for **1**

|           |           |           |           |           |           |           |
|-----------|-----------|-----------|-----------|-----------|-----------|-----------|
| Mo14.551  | Mo2 4.471 | Mo3 4.487 | Mo4 6.214 | W4 6.385  | Mo5 6.078 | W5 6.245  |
| Mo6 6.031 | W6 6.196  | Mo7 6.037 | W7 6.203  | Mo8 6.284 | W8 6.456  | Mo9 5.863 |
| W9 6.023  | W10 6.523 | W11 6.184 | W12 6.213 | O1 2.105  | O2 2.167  | O3 1.428  |
| O4 1.893  | O5 2.04   | O6 2.404  | O7 2.044  | O8 1.266  | O9 1.852  | O10 2.081 |
| O11 1.689 | O12 2.089 | O13 1.492 | O14 1.975 | O15 1.894 | O16 2.052 | O17 2.175 |
| O18 2.134 | O19 1.895 | O20 1.677 | O21 1.832 | O22 2.088 | O23 1.699 | O24 1.927 |
| O25 2.218 | O26 1.956 | O27 2.269 | O28 2.185 | O29 2.071 | O30 1.969 | O31 1.867 |
| O32 1.672 | O33 1.672 | O34 1.805 | O35 1.807 | O36 1.787 | O37 1.631 |           |

**Table S2** BVS results for **2**

|           |           |           |           |           |           |
|-----------|-----------|-----------|-----------|-----------|-----------|
| Mo1 4.246 | W2 5.837  | W3 5.866  | W4 6.082  | W5 5.893  | W6 6.184  |
| W1 6.219  | Mo2 4.274 | Mo3 4.197 | Mo4 4.188 | Mo5 4.347 | Mo6 4.271 |
| O1 1.963  | O2 1.186  | O3 2.207  | O4 1.999  | O5 2.133  | O6 2.043  |
| O7 1.966  | O8 1.586  | O9 2.022  | O10 1.38  | O11 1.949 | O12 2.136 |
| O13 1.781 | O14 1.223 | O15 1.923 | O16 1.848 | O17 1.18  | O18 2.091 |
| O19 2.07  | O20 1.655 | O21 1.887 | O22 1.929 | O23 2.084 | O24 2.026 |
| O25 1.272 | O26 1.998 | O27 1.752 | O28 1.62  | O29 1.901 | O30 1.328 |
| O31 2.148 | O32 2.056 | O33 2.104 | O34 2.073 |           |           |

**Table S3** BVS results for **3**

|           |           |           |           |           |           |
|-----------|-----------|-----------|-----------|-----------|-----------|
| W2 6.03   | Mo2 4.356 | Mo3 4.275 | W1 6.023  | Mo1 4.231 | W3 6.037  |
| W4 5.995  | Na 1.93   | O22 0.457 | O23 0.31  | O24 0.432 | O1 1.023  |
| O2 1.104  | O3 2.124  | O4 2.129  | O5 2.032  | O6 2.073  | O7 1.269  |
| O8 1.904  | O9 1.209  | O10 1.818 | O11 1.883 | O12 1.272 | O13 1.887 |
| O14 1.83  | O15 1.891 | O16 1.963 | O17 2.168 | O18 1.617 | O19 1.69  |
| O20 2.048 | O21 1.858 |           |           |           |           |

**Table S4** BVS results for **4**

|           |            |           |            |           |           |            |
|-----------|------------|-----------|------------|-----------|-----------|------------|
| Zn 1.737  | Mo1 4.227  | Mo2 4.359 | Mo3 4.357  | Mo4 4.214 | Mo5 4.349 | Mo6 4.439  |
| Mo7 5.939 | W7 6.102   | Mo8 5.851 | W8 6.011   | Mo9 5.985 | W9 6.149  | Mo10 5.869 |
| W10 6.03  | Mo11 5.921 | W11 6.083 | Mo12 5.912 | W12 6.074 | O1 2.469  | O2 1.139   |
| O3 1.168  | O4 2.097   | O5 2.204  | O6 1.933   | O7 2.106  | O8 2.092  | O9 2.178   |
| O10 2.081 | O11 2.277  | O12 2.14  | O13 2.233  | O14 2.156 | O15 1.183 | O16 1.947  |
| O17 1.295 | O18 2.285  | O19 1.972 | O20 1.481  | O21 2.041 | O22 2.088 | O23 1.671  |

|           |           |           |           |          |           |           |
|-----------|-----------|-----------|-----------|----------|-----------|-----------|
| O24 1.999 | O251.975  | O26 2.04  | O27 1.793 | O28 2.13 | O29 2.108 | O30 1.782 |
| O31 1.295 | O32 1.643 | O33 1.681 | O34 2.1   |          |           |           |

**Table S5** Bonding energies of Mo 3d from the literatures <sup>48-53</sup> and the binding energies of peaks used to assign species from the present measurements of **2**, **4** (C1s calibrated to 284.5 eV for contrast).

| Oxidation state                                            | Mo 3d5/2       | Mo 3d3/2  |
|------------------------------------------------------------|----------------|-----------|
| Mo(IV)O(OH) <sub>2</sub>                                   | 230.2 eV       | 233.4 eV  |
| Mo(VI)-Na <sub>2</sub> MoO <sub>4</sub> ·2H <sub>2</sub> O | 231.9-232.3 eV | 235-235.4 |
| Mo(IV)-2                                                   | 229.90 eV      | 233.13 eV |
| Mo(IV)-4                                                   | 229.98 eV      | 233.14 eV |
| Mo(VI)-4                                                   | 231.89 eV      | 234.98 eV |
| Oxidation state                                            | W 4f7/2        | W 4f5/2   |
| W(VI)-Na <sub>2</sub> WO <sub>4</sub>                      | 35.3 eV        | 37.4 eV   |
| W(VI)-2                                                    | 34.67 eV       | 36.79 eV  |
| W(VI)-4                                                    | 34.61 eV       | 36.75 eV  |

**Table S6** Structural refinement and crystallographic parameters of **1**, **2**, **3** and **4**

|                             | C <sub>25</sub> H <sub>41</sub> N <sub>5</sub> Mo <sub>4</sub> W <sub>8</sub> O <sub>41</sub> | C <sub>34</sub> H <sub>65</sub> N <sub>8</sub> Mo <sub>6</sub> W <sub>6</sub> O <sub>40.5</sub> | C <sub>34</sub> H <sub>65</sub> N <sub>8</sub> Mo <sub>6</sub> W <sub>6</sub> O <sub>41</sub> Na | C <sub>90</sub> H <sub>114</sub> N <sub>18</sub> Mo <sub>14</sub> W <sub>10</sub> O <sub>76</sub> Zn |
|-----------------------------|-----------------------------------------------------------------------------------------------|-------------------------------------------------------------------------------------------------|--------------------------------------------------------------------------------------------------|------------------------------------------------------------------------------------------------------|
| Empirical formula           | C <sub>25</sub> H <sub>41</sub> N <sub>5</sub> Mo <sub>4</sub> W <sub>8</sub> O <sub>41</sub> | C <sub>34</sub> H <sub>65</sub> N <sub>8</sub> Mo <sub>6</sub> W <sub>6</sub> O <sub>40.5</sub> | C <sub>34</sub> H <sub>65</sub> N <sub>8</sub> Mo <sub>6</sub> W <sub>6</sub> O <sub>41</sub> Na | C <sub>90</sub> H <sub>114</sub> N <sub>18</sub> Mo <sub>14</sub> W <sub>10</sub> O <sub>76</sub> Zn |
| Formula weight              | 2922.12                                                                                       | 2912.68                                                                                         | 2943.67                                                                                          | 5911.02                                                                                              |
| Temperature                 | 293(2) K                                                                                      | 200(2) K                                                                                        | 100(2) K                                                                                         | 153(2) K                                                                                             |
| Wavelength                  | 0.71073 Å                                                                                     | 0.71073 Å                                                                                       | 0.71073 Å                                                                                        | 0.71073 Å                                                                                            |
| Crystal system              | Monoclinic                                                                                    | Monoclinic                                                                                      | Orthorhombic                                                                                     | Triclinic                                                                                            |
| Space group                 | P2 <sub>1</sub> /n                                                                            | P2 <sub>1</sub> /n                                                                              | Cmca                                                                                             | Pī                                                                                                   |
| Unit cell dimensions        | <i>a</i> = 13.583(8) Å                                                                        | <i>a</i> = 15.7129(63) Å                                                                        | <i>a</i> = 23.1566(13) Å                                                                         | <i>a</i> = 13.645(3) Å                                                                               |
|                             | <i>b</i> = 25.864(14) Å                                                                       | <i>b</i> = 25.086(2) Å                                                                          | <i>b</i> = 21.3965(13) Å                                                                         | <i>b</i> = 15.216(4) Å                                                                               |
|                             | <i>c</i> = 20.044(11) Å                                                                       | <i>c</i> = 16.0211(65) Å                                                                        | <i>c</i> = 25.0173(13) Å                                                                         | <i>c</i> = 21.782(5) Å                                                                               |
|                             | <i>α</i> = 90°                                                                                | <i>α</i> = 90°                                                                                  | <i>α</i> = 90°                                                                                   | <i>α</i> = 98.179(2)°                                                                                |
|                             | <i>β</i> = 96.074(12)°                                                                        | <i>β</i> = 94.822(4)°                                                                           | <i>β</i> = 90°                                                                                   | <i>β</i> = 103.9550(10)°                                                                             |
|                             | <i>γ</i> = 90°                                                                                | <i>γ</i> = 90°                                                                                  | <i>γ</i> = 90°                                                                                   | <i>γ</i> = 110.613(2)°                                                                               |
| Volume                      | 7002(7) Å <sup>3</sup>                                                                        | 6292.8(9) Å <sup>3</sup>                                                                        | 12395.3(12) Å <sup>3</sup>                                                                       | 3977.4(16) Å <sup>3</sup>                                                                            |
| Z                           | 4                                                                                             | 4                                                                                               | 8                                                                                                | 1                                                                                                    |
| Density (calculated)        | 2.764 mg/m <sup>3</sup>                                                                       | 3.074 mg/m <sup>3</sup>                                                                         | 3.097 mg/m <sup>3</sup>                                                                          | 2.468 mg/m <sup>3</sup>                                                                              |
| F(000)                      | 5256                                                                                          | 5380                                                                                            | 10624                                                                                            | 2746                                                                                                 |
| Crystal size (mm)           | 0.08×0.03×0.02                                                                                | 0.10×0.10×0.10                                                                                  | 0.08×0.03×0.03                                                                                   | 0.08×0.03×0.02                                                                                       |
| θ range                     | 2.038 to 27.587°                                                                              | 2.38 to 27.56°                                                                                  | 2.397 to 27.496°                                                                                 | 2.077 to 27.473°                                                                                     |
| Index ranges                | -17 17, -33 33, -22 24                                                                        | -20 18, -32 32, -20 20                                                                          | -30 30, -27 25, -32 31                                                                           | -17 17, -19 19, -28 28                                                                               |
| Independent reflections     | 14951 [R(int) = 0.0849]                                                                       | 13808 [R(int) = 0.0730]                                                                         | 7287 [R(int) = 0.0587]                                                                           | 18101 [R(int) = 0.0648]                                                                              |
| Reflections [I ≥ 2σ(I)]     | 10577                                                                                         | 10849                                                                                           | 6192                                                                                             | 14382                                                                                                |
| Completeness                | 94.0 %                                                                                        | 99.9 %                                                                                          | 99.6 %                                                                                           | 99.7 %                                                                                               |
| Restraints/parameters       | 0 / 624                                                                                       | 0 / 790                                                                                         | 2 / 433                                                                                          | 0 / 815                                                                                              |
| S on F <sup>2</sup>         | 1.122                                                                                         | 1.450                                                                                           | 1.50                                                                                             | 1.074                                                                                                |
| Final R indices [I > 2σ(I)] | R <sub>1</sub> =0.068, wR <sub>2</sub> =0.176                                                 | R <sub>1</sub> =0.063, wR <sub>2</sub> =0.184                                                   | R <sub>1</sub> =0.039, wR <sub>2</sub> =0.075                                                    | R <sub>1</sub> =0.056, wR <sub>2</sub> =0.137                                                        |
| Final R indices [all data]  | R <sub>1</sub> =0.090, wR <sub>2</sub> =0.190                                                 | R <sub>1</sub> =0.078, wR <sub>2</sub> =0.201                                                   | R <sub>1</sub> =0.050, wR <sub>2</sub> =0.078                                                    | R <sub>1</sub> =0.073, wR <sub>2</sub> =0.147                                                        |

### 3. Figures

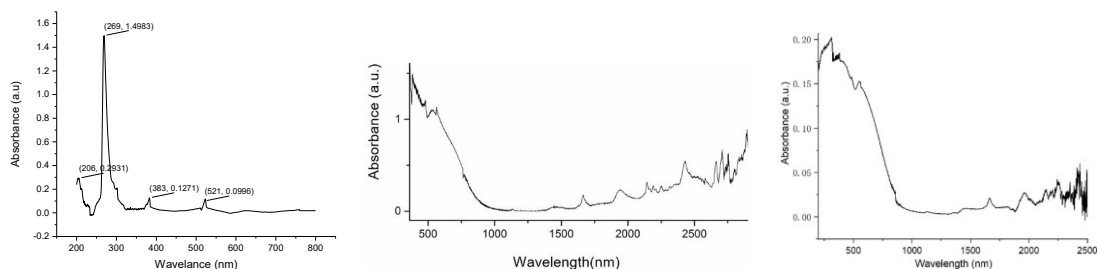

**Fig. S1** (a) UV-vis spectrum of **4** in DMF; (b) Solid-state UV-vis spectrum of **4**; (c) Solid-state UV-vis spectrum of **2**.

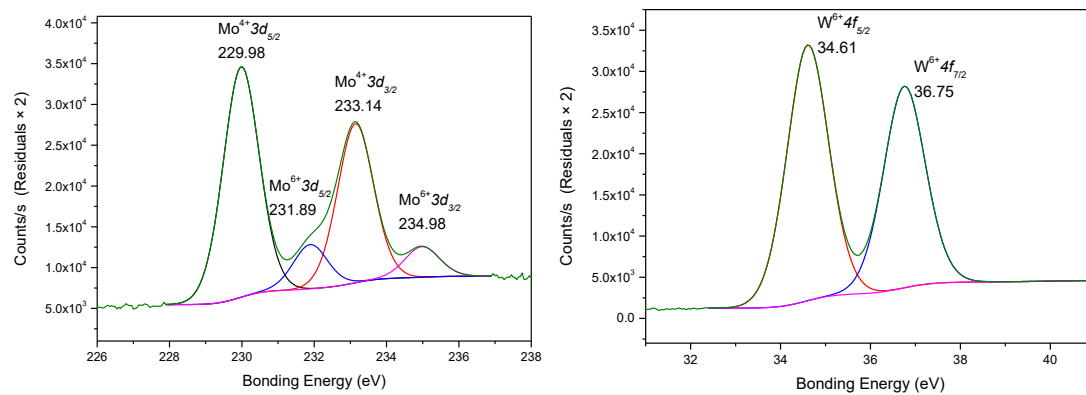

**Fig. S2** XPS spectra of **4**.

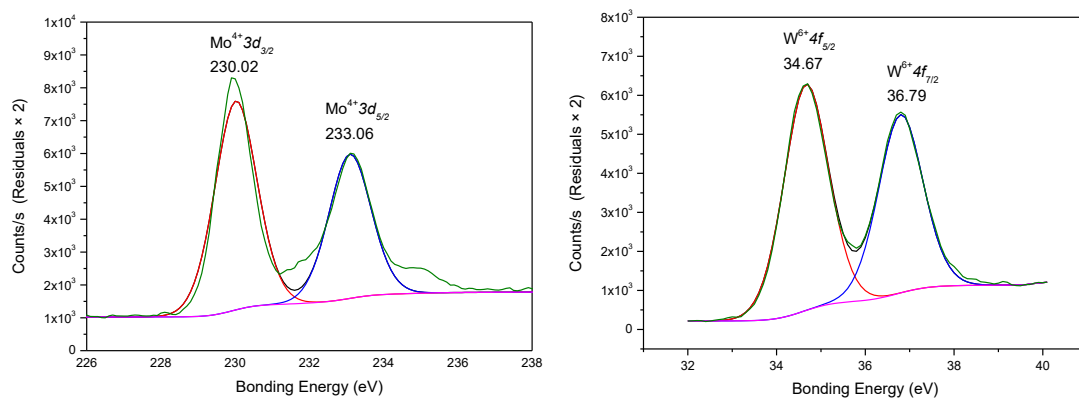

**Fig. S3** XPS spectra of **2**.

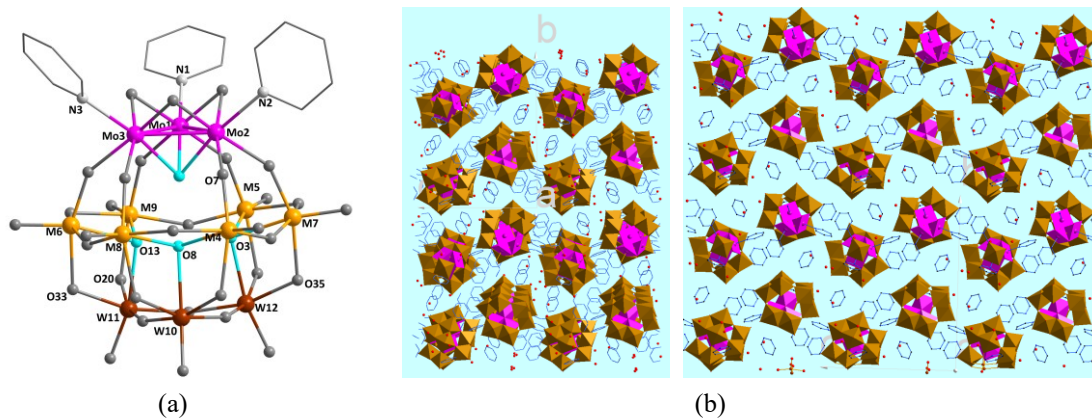

**Fig. S4** (a) Structure of **1**; (b) Crystal packing structure of **1**.

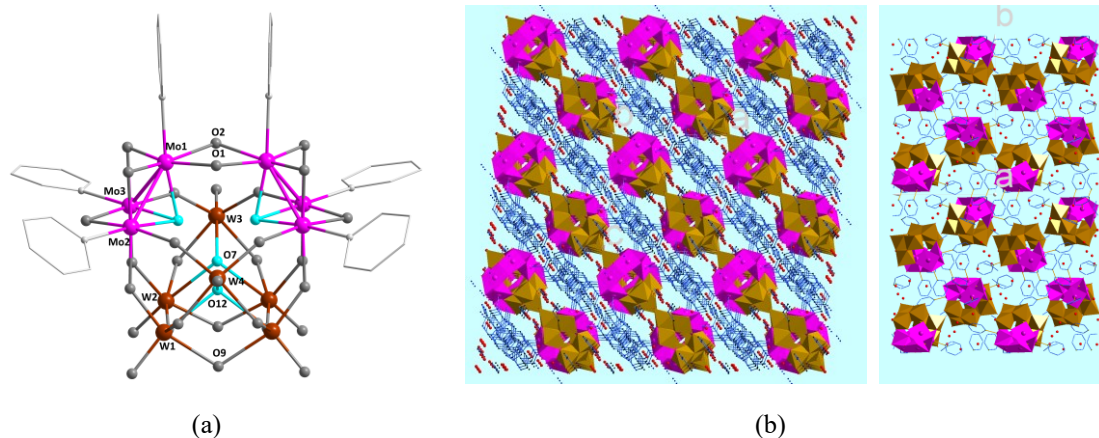

**Fig. S5** (a) Structure of **2**; (b) Crystal packing structure of **2**.

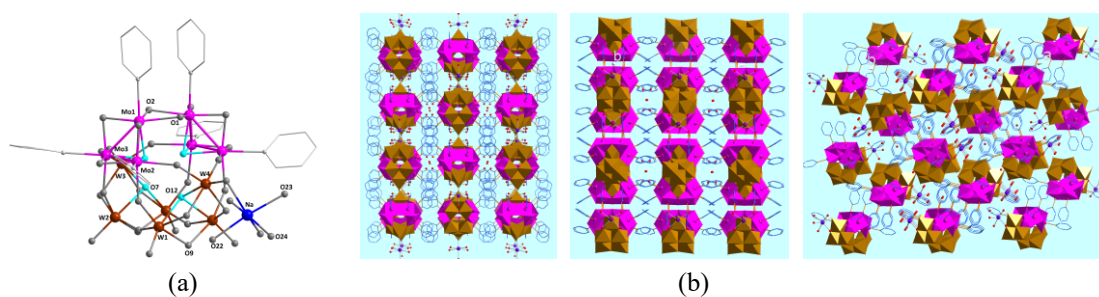

**Fig. S6** (a) Structure of **3**; (b) Crystal packing structure of **3**.

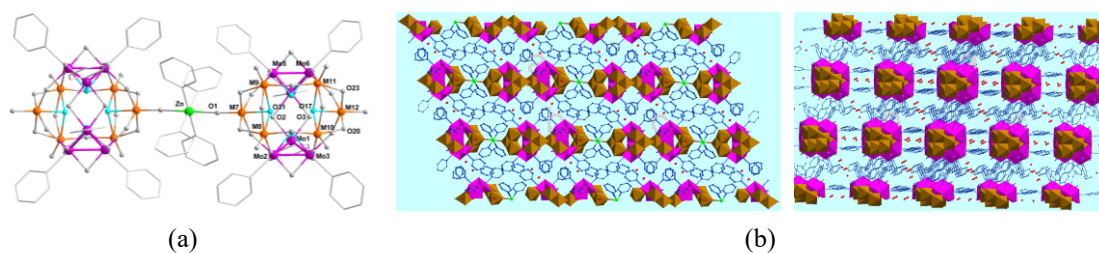

**Fig. S7** (a) Structure of **4**; (b) Crystal packing structure of **4**.

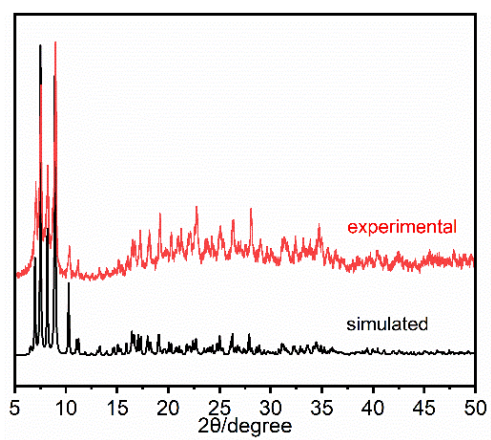

**Fig. S8** Powder X-ray diffraction spectrum of **2**.

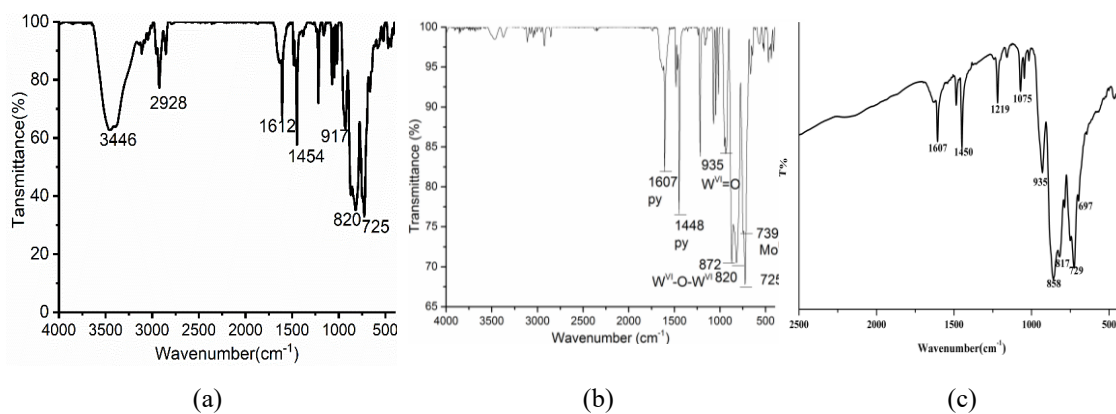

**Fig. S9** IR spectra of **2** (a), **3** (b) and **4** (c).

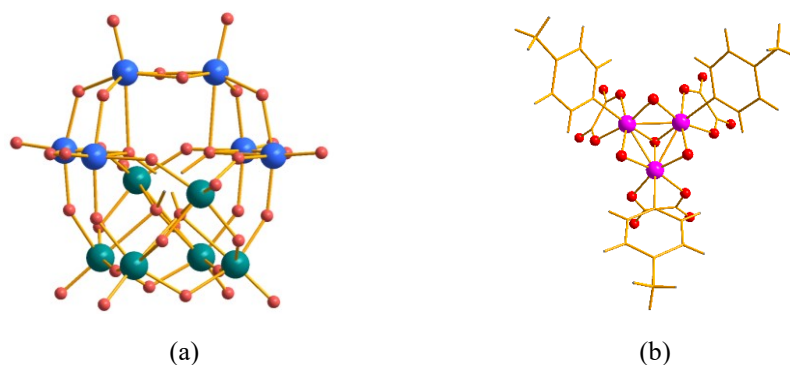

**Fig. S10** Structures of the simulated  $\gamma$ -Keggin cluster  $[\text{H}_4\text{Mo}_6\text{W}_6\text{O}_{40}]^{4+}$  (a), and the discrete  $[\text{Mo}^{\text{IV}}_3\text{O}_4(\text{C}_2\text{O}_4)_3(\text{Mepy})_3]^{2-}$  (b) for DFT calculations (Mo<sup>IV</sup>, pink; Mo<sup>VI</sup>, blue; W, dark green; O, red).

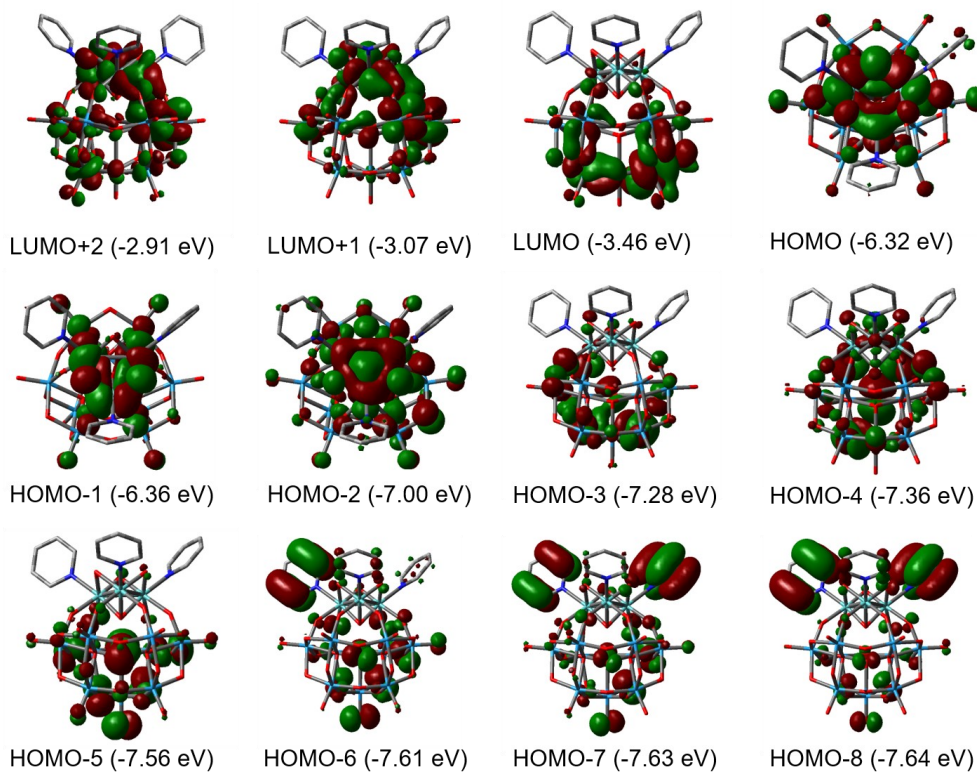

**Fig. S11** MOs of **1**

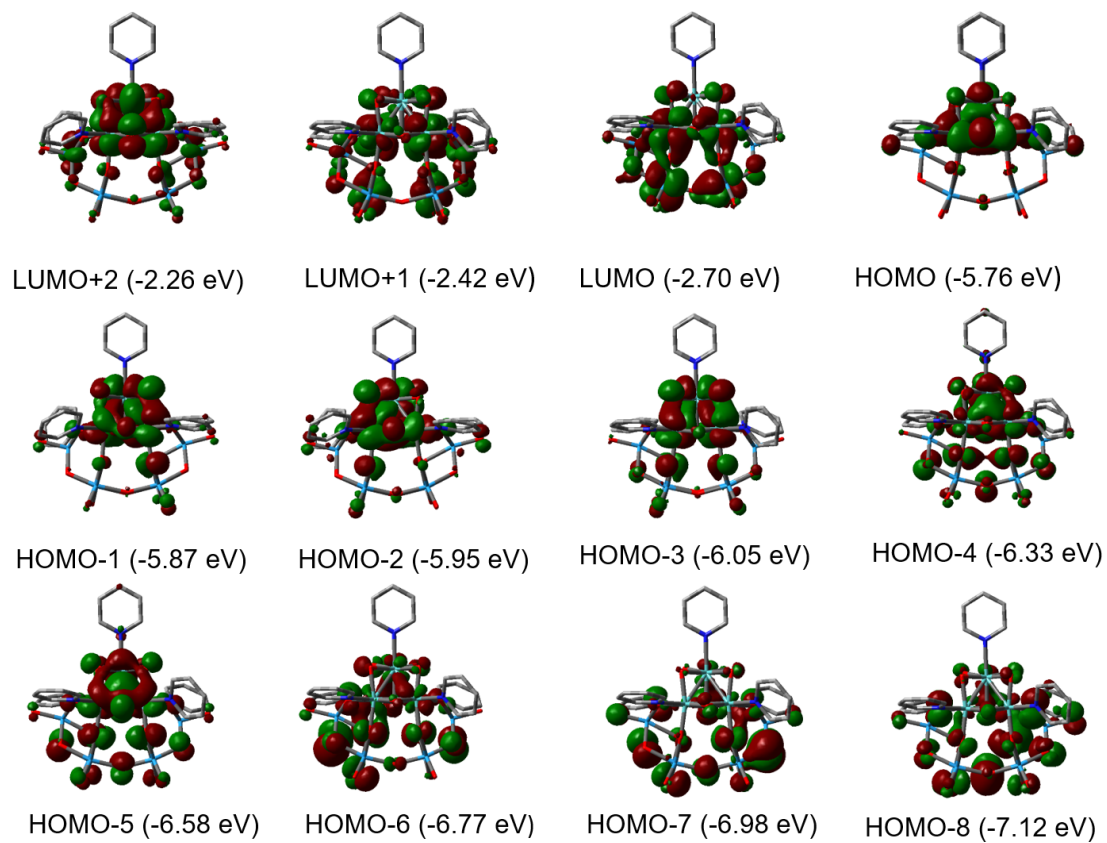

**Fig. S12** MOs of 2

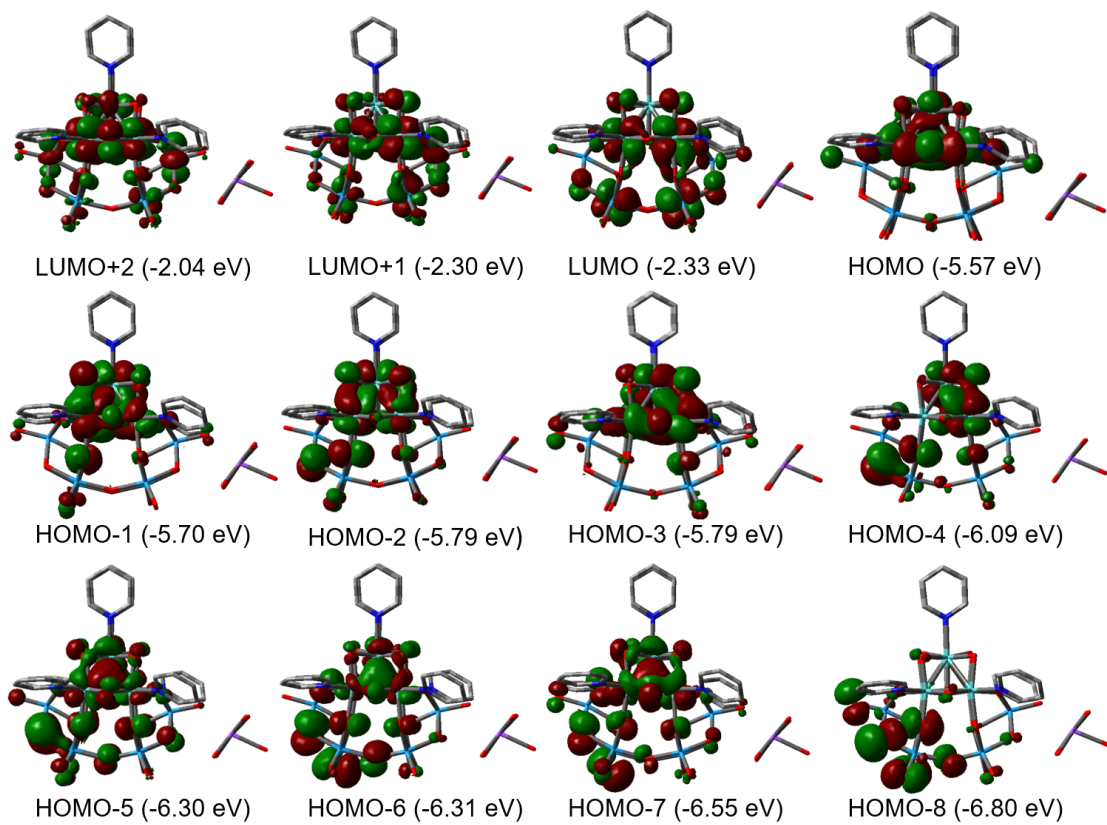

**Fig. S13** MOs of 3

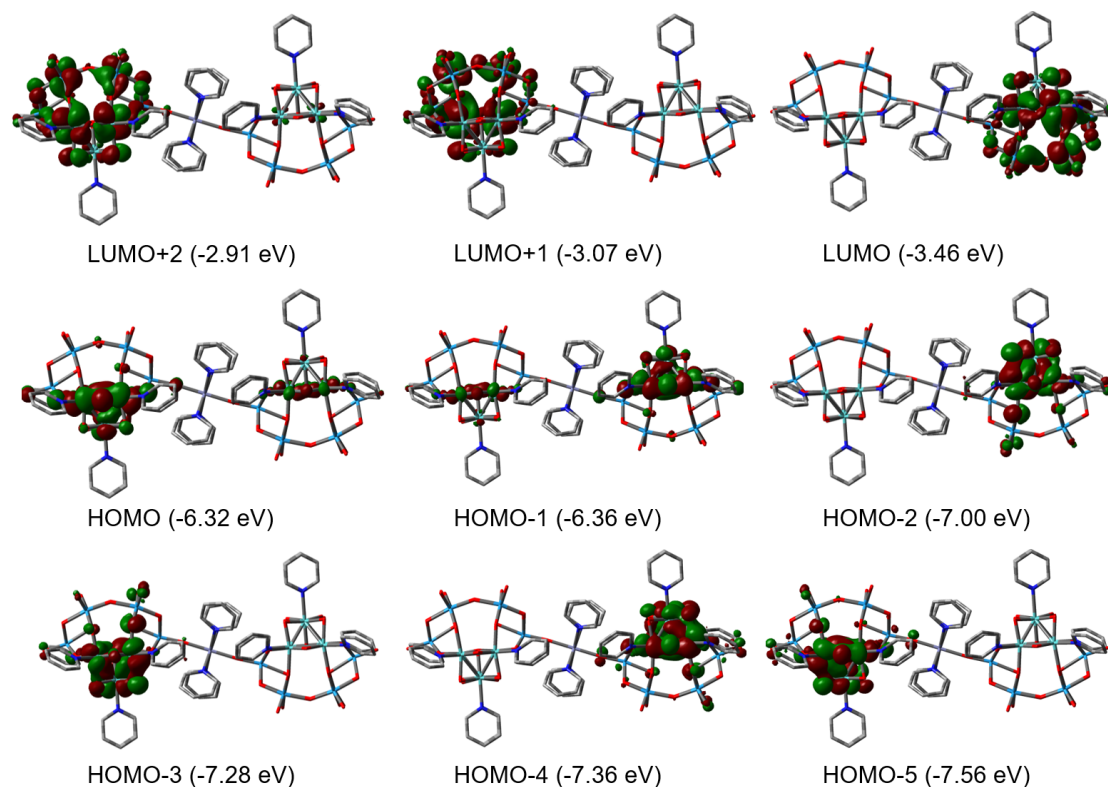

Fig. S14 MOs of 4

## References

42. Gaussian 16, Revision C.01, M. J. Frisch, G. W. Trucks, H. B. Schlegel, G. E. Scuseria, M. A. Robb, J. R. Cheeseman, G. Scalmani, V. Barone, G. A. Petersson, H. Nakatsuji, X. Li, M. Caricato, A. V. Marenich, J. Bloino, B. G. Janesko, R. Gomperts, B. Mennucci, H. P. Hratchian, J. V. Ortiz, A. F. Izmaylov, J. L. Sonnenberg, D. Williams-Young, F. Ding, F. Lipparini, F. Egidi, J. Goings, B. Peng, A. Petrone, T. Henderson, D. Ranasinghe, V. G. Zakrzewski, J. Gao, N. Rega, G. Zheng, W. Liang, M. Hada, M. Ehara, K. Toyota, R. Fukuda, J. Hasegawa, M. Ishida, T. Nakajima, Y. Honda, O. Kitao, H. Nakai, T. Vreven, K. Throssell, J. A. Montgomery, Jr., J. E. Peralta, F. Ogliaro, M. J. Bearpark, J. J. Heyd, E. N. Brothers, K. N. Kudin, V. N. Staroverov, T. A. Keith, R. Kobayashi, J. Normand, K. Raghavachari, A. P. Rendell, J. C. Burant, S. S. Iyengar, J. Tomasi, M. Cossi, J. M. Millam, M. Klene, C. Adamo, R. Cammi, J. W. Ochterski, R. L. Martin, K. Morokuma, O. Farkas, J. B. Foresman, and D. J. Fox, Gaussian, Inc., Wallingford CT, 2016.
43. A. D. Becke, Density Functional Theochemistry. III The Role of Exact Exchange, *J. Chem. Phys.*, 1993, **98**, 5648-5652.
44. C. Lee, W. Yang and R. G. Parr, *Phys. Rev. B: Condens. Matter Mater. Phys.*, 1988, **37**, 785-789.
45. M. Cossi, G. Scalmani, N. Rega and V. Barone, New developments in the polarizable continuum model for quantum mechanical and classical calculations on molecules in solution, *J. Chem. Phys.*, 2002, **117**, 43-54.
46. V. Barone, M. Cossi and J. Tomasi, A new definition of cavities for the computation of solvation free energies by the polarizable continuum model, *J. Chem. Phys.*, 1997, **107**, 3210-3221.
47. T. Lu and F. W. Chen, Quantitative analysis of molecular surface based on improved Marching Tetrahedra algorithm, *J. Mol. Graph. Model.*, 2012, **38**, 314-323.



48. B. Brox and I. Olefjord, Quantitative analysis of molecular surface based on improved Marching Tetrahedra algorithm, *Surf. Interface Anal.* 1988, **13**, 3-6.
49. C. R. Clayton and Y. C. Lu, Electrochemical and XPS evidence of the aqueous formation of Mo<sub>2</sub>O<sub>5</sub>, *Surf. Interface Anal.*, 1989, **14**, 66-70.
50. Y. C. Lu and C.R. Clayton, An XPS study of the passive and transpassive behavior of molybdenum in deaerated 0.1 M HCl, *Corros. Sci.*, 1989, **29**, 927-937.
51. I. A. Okonkwo, J. Doff, A. Baron-Wiecheć, G. Jones, E. V. Koroleva, P. Skeldon and G. E. Thompson, Oxidation states of molybdenum in oxide films formed in sulphuric acid and sodium hydroxide, *Thin Solid Films*, 2012, **520**, 6318-6327.
52. C. Shi, A.M. Zhu, X. F. Yang and C.T. Au, NO reduction with hydrogen over cobalt molybdenum nitride and molybdenum nitride: A comparison study, *Catal. Lett.* 2004, **97**, 9-16.
53. F. Werfel and E. Minni, Photoemission study of the electronic structure of Mo and Mo oxides, *J. Phys. C: Solid State Phys.* 1983, **16**, 6094.
